# Supplementary material
Source: PubMed Central journal article supplement (PMC6510992)
Supplement: pnas.1818595116.sapp.pdf [file pnas.1818595116.sapp.pdf]

## Supporting Information

**Table S1.** Joint analysis of Leu<sup>+</sup> recombinants.

**Table S2.** Yeast strains used in this study.

**Supplementary Fig. S1. Time course of DSB and repair product formation. (A)** Galactose-induced cutting efficiency of the HO cut-sites in the *LEU2* cassette was measured in three strains (XV,V-a, XV,V-b, and V,VIII-2) after pre-growth to exponential phase in YPA glycerol. Cutting efficiencies of the 1<sup>st</sup> and 2<sup>nd</sup> cut-sites in the suicide deletion cassette (*i.e.* the two cut sites in the *ade2* allele that flank the *GAL1-HO* gene fusion) were measured in two of the above strains and the values averaged for plotting. Results are expressed as the fraction of intact, *i.e.* unbroken, alleles as compared to a control allele lacking an HO cut-site. **(B)** A yeast strain bearing only the *ade2* suicide deletion cassette was used to measure formation of the suicide deletion NHEJ repair product (right Y axis, open symbols) relative to DSB formation at the 1<sup>st</sup> cut-site (left Y axis, closed symbols). Yeast were pre-grown either to exponential phase in YPA glycerol (purple), similar to (A), or to saturation in synthetic defined medium for 2 days, similar to the Liquid Galactose plating method (blue).

**Supplementary Fig. S2. PCR validation of reciprocal translocations.** Leu<sup>+</sup> isolates were subjected to PCR using the illustrated primers. PCR products were sequenced to confirm the exact sequence of joints as being primarily precise NHEJ.

**Supplementary Fig. S3. *Trans* repair frequencies are not a result of the suicide deletion format. (A)** Schematic showing the reporter-based assay to detect reciprocal translocations with ablation of one HO cut site in the *ADE2* suicide deletion cassette. **(B)** *Trans* repair frequency of different strains using the transient galactose method and comparison with galactose plates and liquid galactose methods. Data are the mean  $\pm$  SD from three or four independent experiments.

**Supplementary Fig. S4. Example PCR from competition assay.** PCR amplification of Leu<sup>+</sup> recombinants using the two indicated sets of primers to discriminate whether the *LEU2* (HYG) or *LEU2* (NAT) cassette was used during competitive *trans* repair.

**Supplementary Fig. S5. Deletions of *RAD9* and *RAD51* do not alter observed *trans* NHEJ repair frequencies.** Inter- and intra-chromosomal repair assay measuring total survival **(A)** and *trans* repair frequency **(B)** in wild-type, *rad51* $\Delta$  and *rad9* $\Delta$  strains.

**Supplementary Fig. S6. Detailed view of donor locations in HR experiments.** **(A)** Diagram showing the fixed position of the *ADE2* cassette on chrXV and variable positions of the donor sequence in different strains. **(B)** Similar to **(A)** for the *ADE2* cassette on chrV. **(C)** Similar to **(A)** for the *ILV1-HOcs* on chrV. Contact frequencies (CF) between the *ADE2* cassette and donor locus are indicated.

**Supplementary Fig. S7. Relationship of DSB and donor loci proximity and HR efficiency.** Each top panel shows a schematic of the positions of the suicide deletion cassette at the **(A)** *ADE2* locus or **(B)** *CAN1* locus, or **(C)** the *ILV1-HO* cut-site, as well as donor sequences inserted at different places in the genome. Bottom panels show HR efficiency as a function of contact frequency (glycerol-galactose method).

**Supplementary Fig. S8. Validation of HR repair by restriction digestion.** **(A)** PCR amplification was performed on DNA from Ade<sup>-</sup> HR survivors from Fig. S7A using the indicated primers. Products were digested with MluI to confirm that they contain the product expected for HR repair by gene conversion (here the donor contained an MluI site not present in the starting *ADE2* allele). MluI undigested and digested DNAs were run side by side. **(B)** PCR amplification of HR survivors from Fig. S7C using the two indicated primers. Products were digested with PstI to confirm they contain the product expected for HR repair by gene conversion (here the donor lacked a PstI site that was present in the starting *ILV1* allele). The first lanes in each row show PstI digested DNA amplified from the *ILV1* region with the HO cut-site intact. All other lanes show PstI digested DNA amplified from survivor colonies.

## **Table S1: Joint analysis of Leu+ recombinants**

**HO cleavage site (uppercase & underlined) and its flanking sequences, in frame with start codon of ADE2.**

agtatggatctcgagGTTTATAAAATTATACTGTTGCGGAAAGCTGAAACTgttgtggaaatgtaa

| Strain                                    | Junctional Sequence of Leu2 recombinants       | Number of Events |
|-------------------------------------------|------------------------------------------------|------------------|
| XV,V<br>(ADE2 promoter-<br>Leu2 junction) | GTTTATAAAATTATACT <u>GTTT</u> GCGGAAAGCTGAAACT | 20               |
| XV,V<br>(HYG-ADE2<br>coding junction)     | GTTTATAAAATTATACT <u>GTTT</u> GCGGAAAGCTGAAACT | 19               |
| XV,V<br>(HYG-ADE2<br>coding junction)     | No PCR product                                 | 1                |

**Table S2: Yeast strains used in this study.**

| Strains            | Genotypes                                                                                                                                                                                        |
|--------------------|--------------------------------------------------------------------------------------------------------------------------------------------------------------------------------------------------|
| YW1275             | <i>MAT<math>\alpha</math>-inc ade2::HOSD(0)::STE3MET15 his3<math>\Delta</math>1 leu2<math>\Delta</math>0 met15<math>\Delta</math>0 ura3<math>\Delta</math>0</i>                                  |
| YW2695 (XV,V-a)    | YW1275, ChrV, 34kb:: <i>leu2-HYG</i>                                                                                                                                                             |
| YW2837 (XV,V-b)    | YW1275, ChrV, 358kb:: <i>leu2-HYG</i>                                                                                                                                                            |
| YW2839 (XV,VIII-a) | YW1275, ChrVIII, 314kb:: <i>leu2-HYG</i>                                                                                                                                                         |
| YW2841 (XV,VIII-b) | YW1275, ChrVIII, 35kb:: <i>leu2-HYG</i>                                                                                                                                                          |
| YW2843 (XV,XVI)    | YW1275, ChrXVI, 126kb:: <i>leu2-HYG</i>                                                                                                                                                          |
| YW2845 (XV,VI)     | YW1275, ChrVI, 39kb:: <i>leu2-HYG</i>                                                                                                                                                            |
| YW2784 (XV-9kb)    | YW1275, ChrXV, 555kb:: <i>leu2-HYG</i>                                                                                                                                                           |
| YW2788 (XV-110kb)  | YW1275, ChrXV, 458kb:: <i>leu2-HYG</i>                                                                                                                                                           |
| YW2790 (XV-345kb)  | YW1275, ChrXV, 223kb:: <i>leu2-HYG</i>                                                                                                                                                           |
| YW2861             | <i>MAT<math>\alpha</math>-inc ade2::URA3<br/>NPR2 prom::<i>ade2::HOSD(0)::STE3MET15 his3<math>\Delta</math>1 leu2<math>\Delta</math>0 met15<math>\Delta</math>0 ura3<math>\Delta</math>0</i></i> |
| YW2865 (V,III)     | YW2861, ChrIII, 41kb:: <i>leu2-HYG</i>                                                                                                                                                           |
| YW2867 (V,X)       | YW2861, ChrX, 122kb:: <i>leu2-HYG</i>                                                                                                                                                            |
| YW2869 (V,VI)      | YW2861, ChrVI, 39kb:: <i>leu2-HYG</i>                                                                                                                                                            |
| YW2871 (V,VIII-1)  | YW2861, ChrVIII, 314kb:: <i>leu2-HYG</i>                                                                                                                                                         |
| YW2873 (V,VIII-2)  | YW2861, ChrVIII, 35kb:: <i>leu2-HYG</i>                                                                                                                                                          |
| YW2875 (V,XVI)     | YW2861, ChrXVI, 126kb:: <i>leu2-HYG</i>                                                                                                                                                          |
| YW2903 (V-13kb-R)  | YW2861, ChrV, 47kb:: <i>leu2-HYG</i>                                                                                                                                                             |
| YW2905 (V-153kb)   | YW2861, ChrV, 187kb:: <i>leu2-HYG</i>                                                                                                                                                            |
| YW2907 (V-13kb-L)  | YW2861, ChrV, 21kb:: <i>leu2-HYG</i>                                                                                                                                                             |

|                     |                                                                                |
|---------------------|--------------------------------------------------------------------------------|
| YW2909 (V-358kb)    | YW2861, ChrV, 358kb:: <i>leu2-HYG</i>                                          |
| YW2877 (XV,V,VI)    | YW2837, ChrVI, 39kb:: <i>leu2-NAT</i>                                          |
| YW2884 (V,VI,XVI)   | YW2869, ChrXVI, 126kb:: <i>leu2-NAT</i>                                        |
| YW2893 (V,VI,VIII)  | YW2869, ChrVIII, 314kb:: <i>leu2-NAT</i>                                       |
| YW2933 (V,VIII,VI)  | YW2920, ChrVIII, 314kb:: <i>leu2-HYG</i>                                       |
| YW2728              | YW2695, <i>rad9Δ</i> :: <i>KanMX4</i>                                          |
| YW2732              | YW2695, <i>tel1Δ</i> :: <i>KanMX4</i>                                          |
| YW2736              | YW2695, <i>dnl4Δ</i> :: <i>URA3</i>                                            |
| YW2953              | YW2695, <i>rad51Δ</i> :: <i>KanMX4</i>                                         |
| YW2804              | YW2790, <i>rad9Δ</i> :: <i>KanMX4</i>                                          |
| YW2806              | YW2784, <i>tel1Δ</i> :: <i>KanMX4</i>                                          |
| YW2808              | YW2788, <i>tel1Δ</i> :: <i>KanMX4</i>                                          |
| YW2810              | YW2790, <i>tel1Δ</i> :: <i>KanMX4</i>                                          |
| YW2816              | YW2790, <i>dnl4Δ</i> :: <i>URA3</i>                                            |
| YW2956              | YW2790, <i>rad51Δ</i> :: <i>KanMX4</i>                                         |
| YW2988              | YW2837, <i>tel1Δ</i> :: <i>KanMX4</i>                                          |
| YW2990              | YW2843, <i>tel1Δ</i> :: <i>KanMX4</i>                                          |
| YW2992              | YW2869, <i>tel1Δ</i> :: <i>KanMX4</i>                                          |
| YW2994              | YW2871, <i>tel1Δ</i> :: <i>KanMX4</i>                                          |
| YW2996              | YW2875, <i>tel1Δ</i> :: <i>KanMX4</i>                                          |
| YW2851              | YW2695 ( <i>ade2-cs</i> mut)                                                   |
| YW2853              | YW2837 ( <i>ade2-cs</i> mut)                                                   |
| YW2855              | YW2843 ( <i>ade2-cs</i> mut)                                                   |
| YW726               | <i>MATa ade2</i> :: <i>SD0+</i> :: <i>URA3 his3Δ1 leu2Δ0 LYS2 MET15 ura3Δ0</i> |
| YW2959 (SSA-XV,V-a) | YW726, ChrV, 34kb:: <i>leu2-ISce1-HYG</i>                                      |
| YW2961 (SSA-XV,V-b) | YW726, ChrV, 358kb:: <i>leu2-ISce1-HYG</i>                                     |

|                       |                                                                                                |
|-----------------------|------------------------------------------------------------------------------------------------|
| YW2963 (SSA-XV,VIII)  | YW726, ChrVIII, 314kb:: <i>leu2-ISce1-HYG</i>                                                  |
| YW2965 (SSA-XV,XVI)   | YW726, ChrXVI, 126kb:: <i>leu2-ISce1-HYG</i>                                                   |
| YW3016 (HR-V,XVI)     | YW2861, ChrXVI, 126kb:: <i>ade2-HYG</i>                                                        |
| YW3018 (HR-V,VIII-1)  | YW2861, ChrVIII, 314kb:: <i>ade2-HYG</i>                                                       |
| YW3020 (HR-V,III)     | YW2861, ChrIII, 41kb:: <i>ade2-HYG</i>                                                         |
| YW3022 (HR-V,VI)      | YW2861, ChrVI, 39kb:: <i>ade2-HYG</i>                                                          |
| YW3024 (HR-V,V)       | YW2861, ChrV, 358kb:: <i>ade2-HYG</i>                                                          |
| YW3026 (HR-XV,VI)     | YW1275, ChrVI, 39kb:: <i>ade2-HYG</i>                                                          |
| YW3028 (HR-XV,XVI)    | YW1275, ChrXVI, 126kb:: <i>leu2-HYG</i>                                                        |
| YW3030 (HR-XV,VIII-a) | YW1275, ChrVIII, 314kb:: <i>ade2-HYG</i>                                                       |
| YW3032 (HR-XV,V-b)    | YW1275, ChrV, 358kb:: <i>ade2-HYG</i>                                                          |
| YW3034 (HR-XV,V-a)    | YW1275, ChrV, 34kb:: <i>ade2-HYG</i>                                                           |
| YW3036 (HR-XV,XV)     | YW1275, ChrXV, 223kb:: <i>ade2-HYG</i>                                                         |
| YW1858                | <i>MATa-inc::LEU2 can1Δ::ILV1-QPCR gal1::HO his3Δ1<br/>ILV1prm::HOcs leu2Δ0 met15Δ0 ura3Δ0</i> |
| YW3119 (V,I-1cs)      | YW1858, ChrI, 185kb:: <i>ILV1(2kb)</i> [pGAL1]                                                 |
| YW3121 (V,III-1cs)    | YW1858, ChrIII, 41kb:: <i>ILV1(2kb)</i> [pGAL1]                                                |
| YW3125 (V,XVI-1cs)    | YW1858, ChrXVI, 126kb:: <i>ILV1(2kb)</i> [pGAL1]                                               |
| YW3127 (V,VIII-1cs)   | YW1858, ChrVIII, 314kb:: <i>ILV1(2kb)</i> [pGAL1]                                              |
| YW3129 (V,XIV-1cs)    | YW1858, ChrXIV, 293kb:: <i>ILV1(2kb)</i> [pGAL1]                                               |
| YW3164 (V,V-1cs)      | YW1858, ChrV, 34kb:: <i>ILV1(2kb)</i> [pGAL1]                                                  |
| YW3166 (V,XII-1cs)    | YW1858, ChrXII, 489kb:: <i>ILV1(2kb)</i> [pGAL1]                                               |

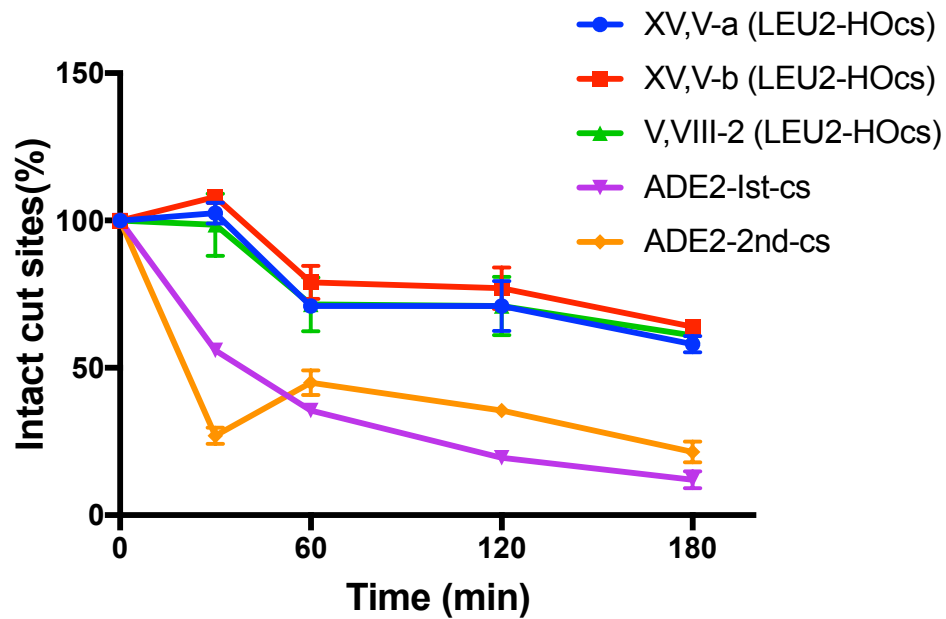

Fig. S1A

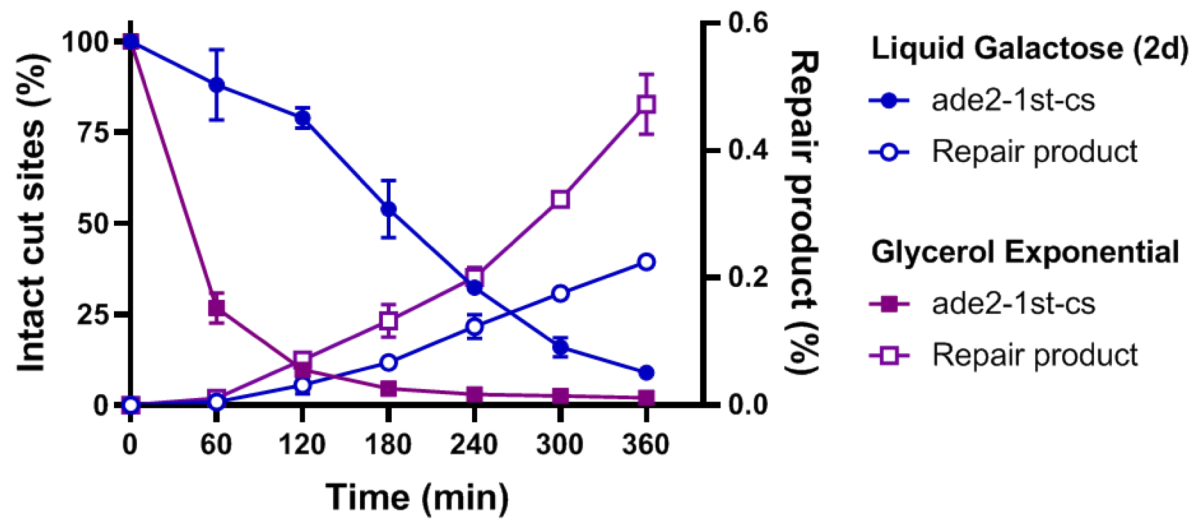

Fig. S1B

XV,V-a (Leu+ isolates)

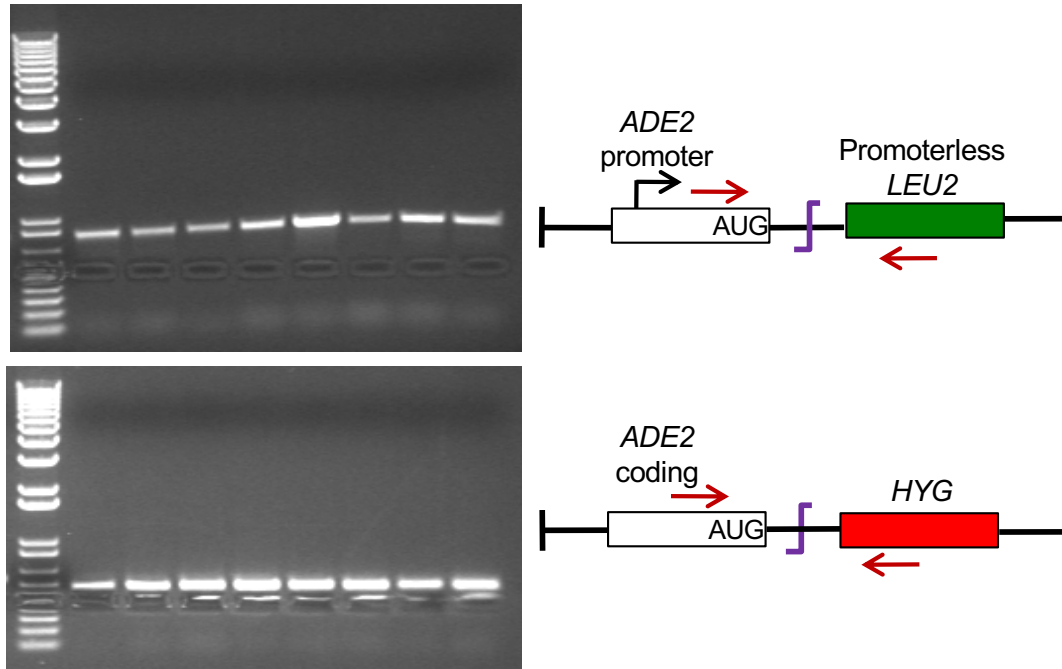

Fig. S2



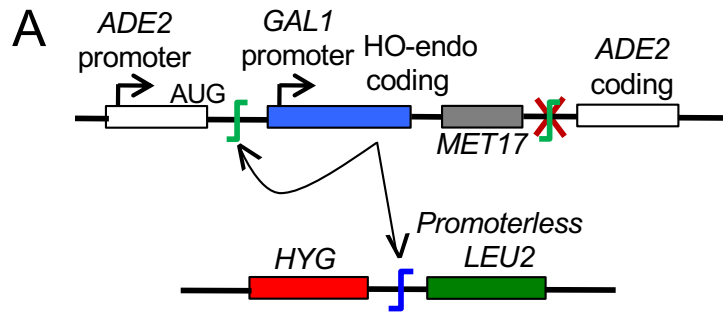

Fig. S3

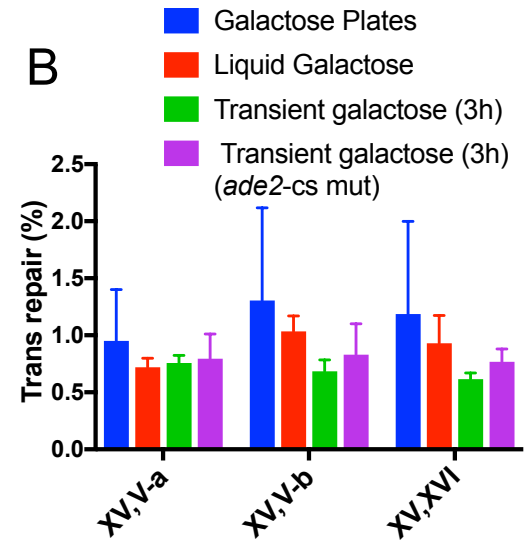

XV,V,VI (Leu+ isolates)

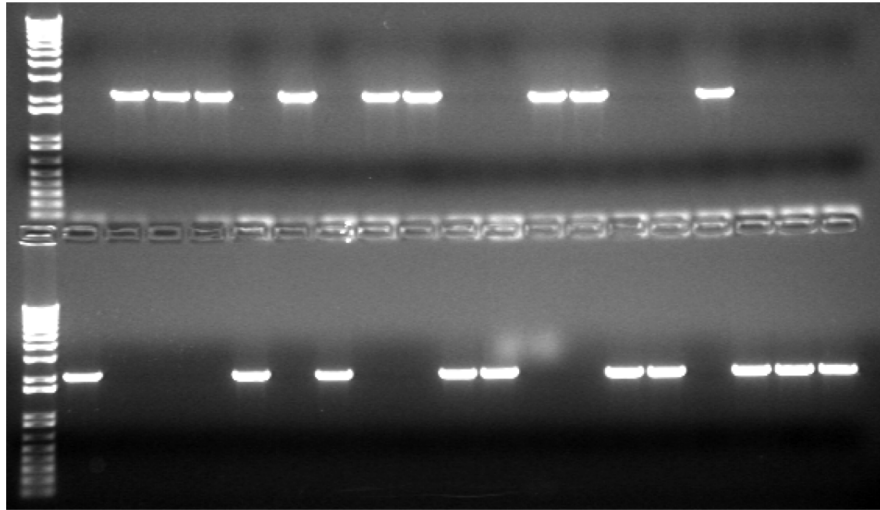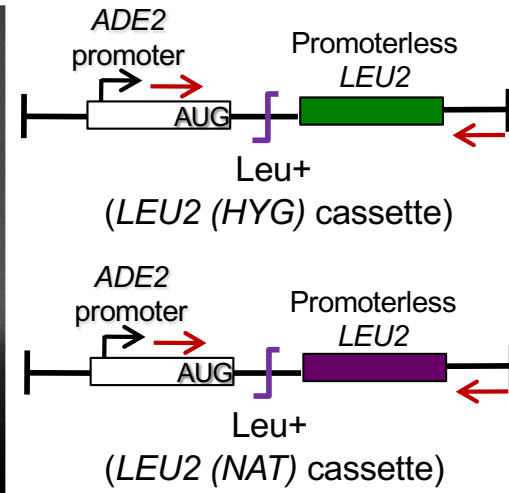

Fig. S4

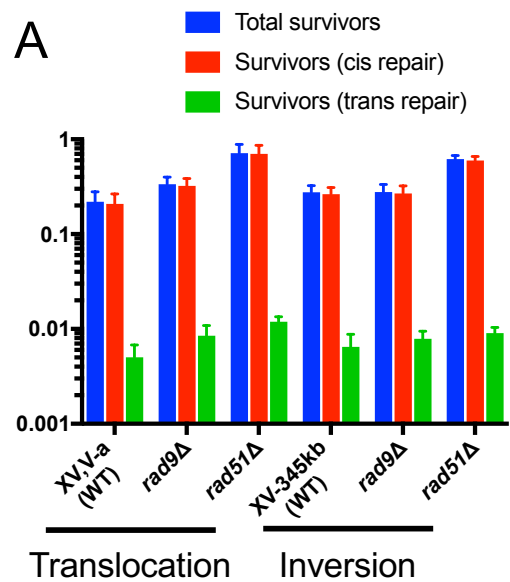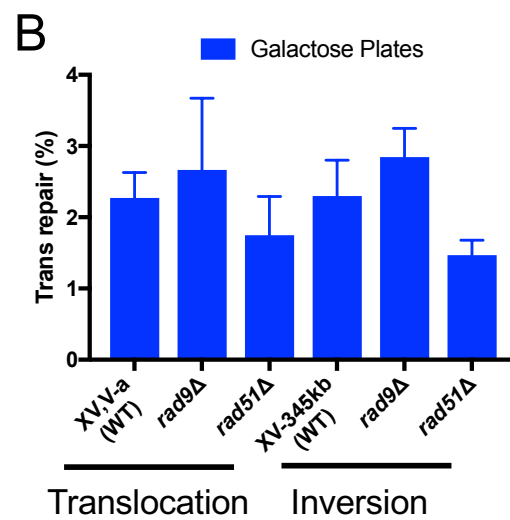

Fig. S5

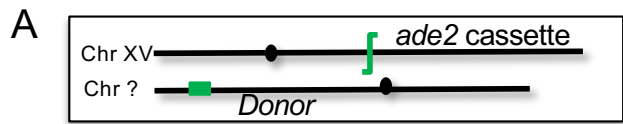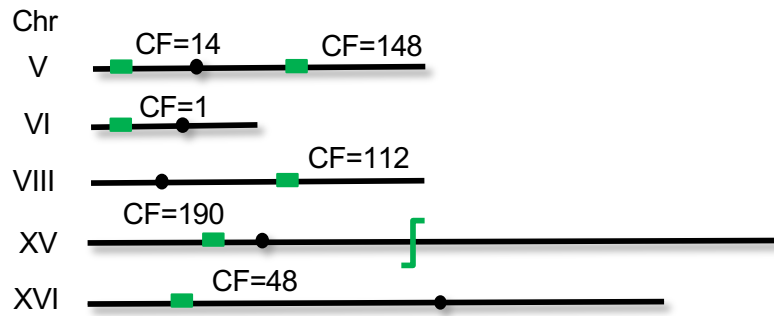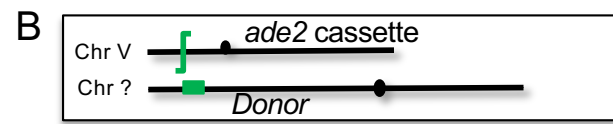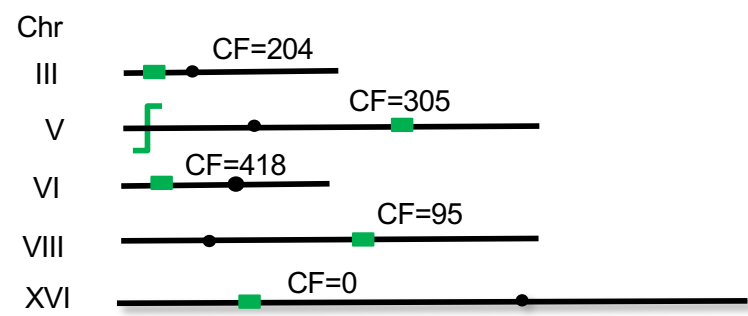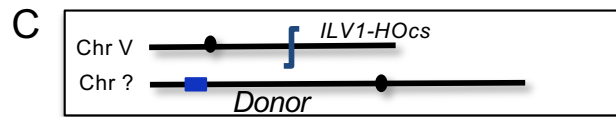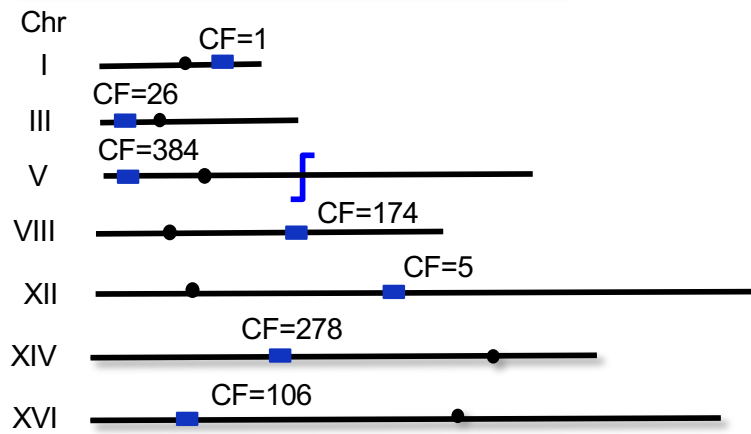

Fig. S6

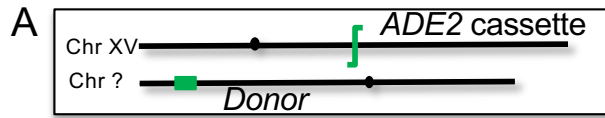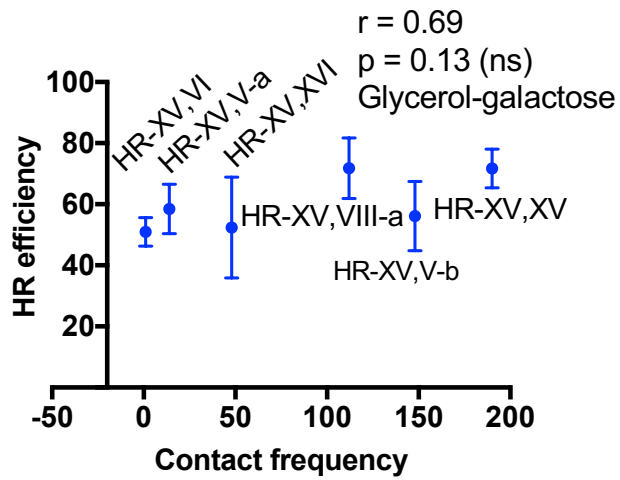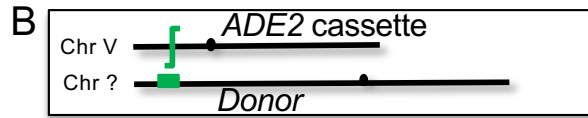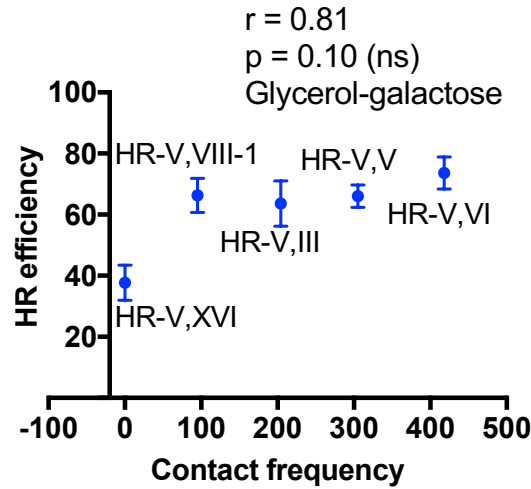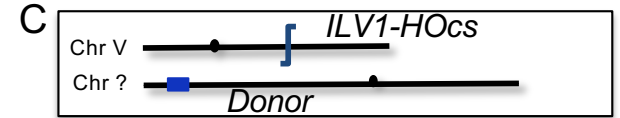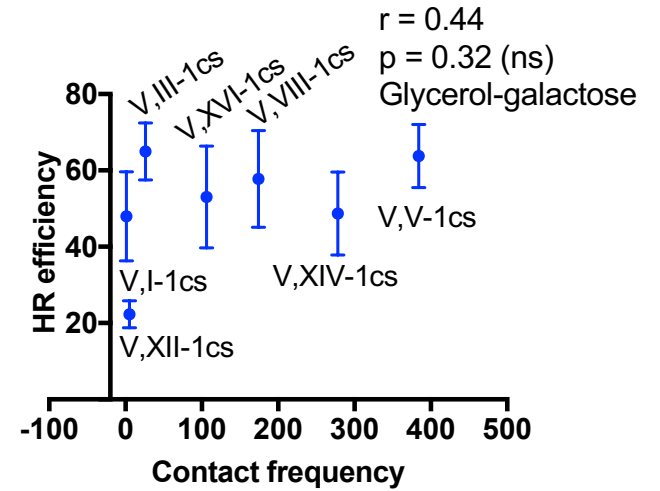

Fig. S7

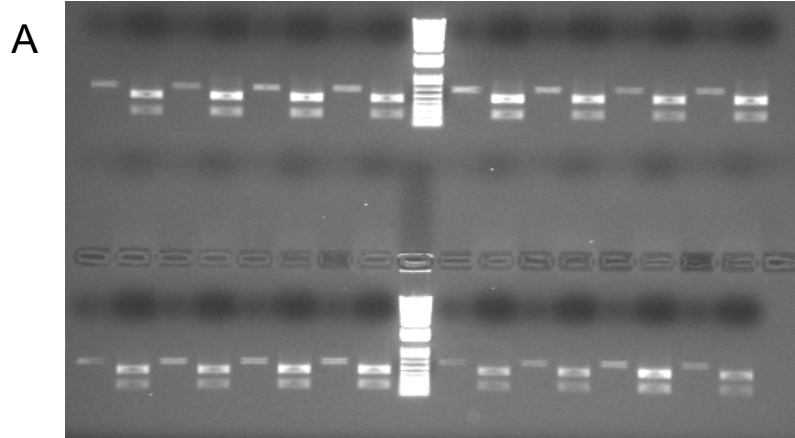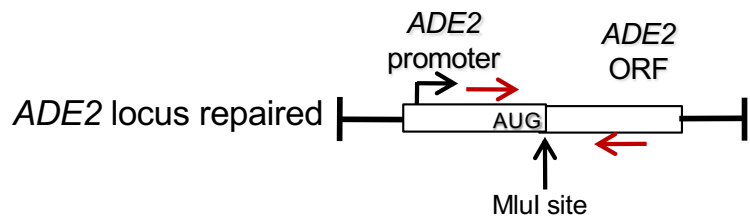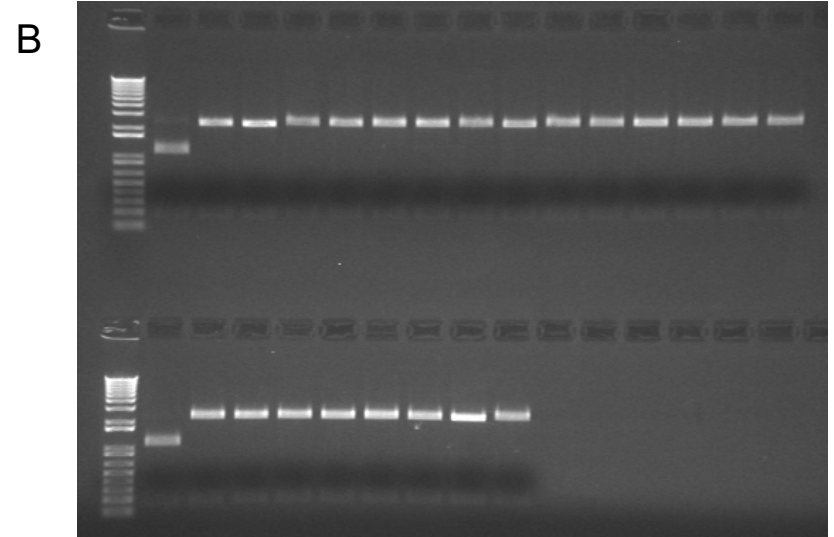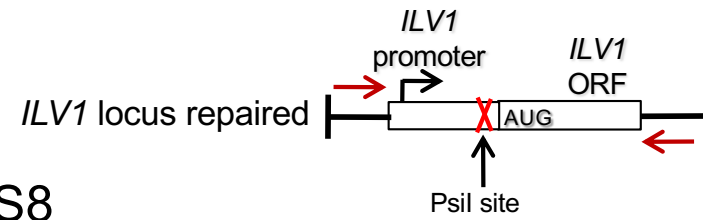

Fig. S8
